# Supplementary material
Source: Springer Nature journal article supplement (https://www.springermedizin.de/resource/supplementary/13054_2009_8371_MOESM1_ESM.pdf/9731816)

First dose

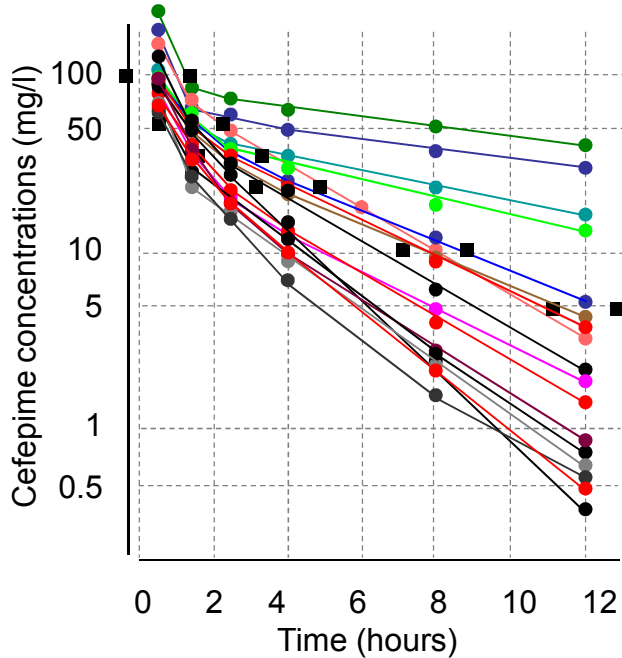

Steady state

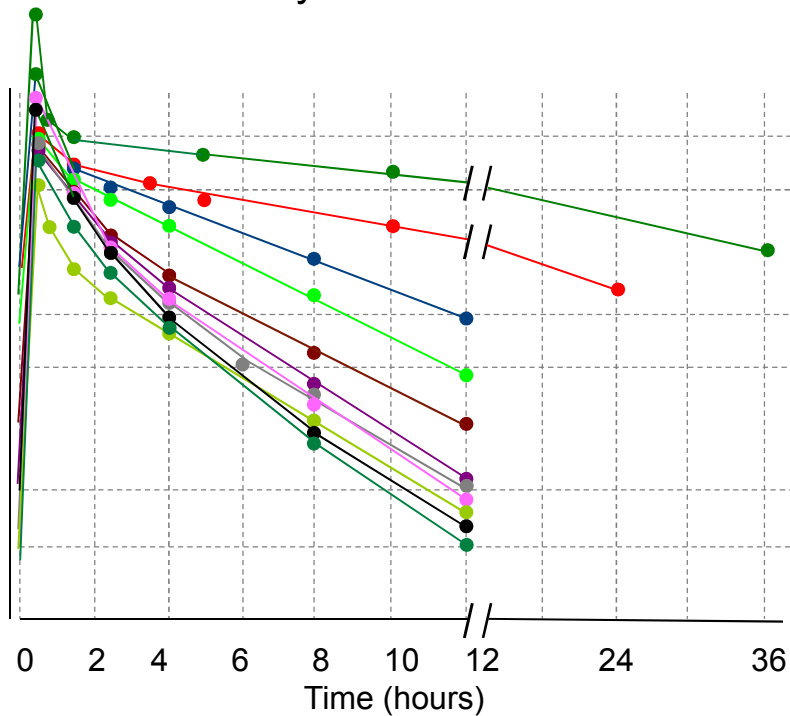

Supplement: MOESM1 [file 9731816]
